# Supplementary material for: Cordycepin inhibits lipopolysaccharide-induced cell migration and invasion in human colorectal carcinoma HCT-116 cells through down-regulation of prostaglandin E2 receptor EP4
Source: PubMed Central journal article supplement — BMB Rep. 2018 Oct 31;51(10):532–7. doi: 10.5483/BMBRep.2018.51.10.120 (PMC6235086; doi:10.5483/bmbrep.2018.51.10.120), 2018-10-31

Supplement. Table 1. Sequences of the primers used in RT-PCR analysis.

| Gene  | Primer            | Sequence               | Accession number |
|-------|-------------------|------------------------|------------------|
| COX-2 | Sense primer      | CAGCAAATCCTTGCTGTTCC   | XM-004028064.1   |
|       | Anti-sense primer | TGGGCAAAGAATGCAAACATC  |                  |
| EP1   | Sense primer      | ATGTCCGAAGCAAACATCAC   | NM-010927.3      |
|       | Anti-sense primer | TAATGTCCAGGAAGTAGGTG   |                  |
| EP2   | Sense primer      | ATGAGCACAGAAAGCATGATC  | NM-013693.1      |
|       | Anti-sense primer | TACAGGCTTGTCACCTCGAATT |                  |
| EP3   | Sense primer      | CTCGTGCTGTCCGACCCATAT  | NM-008361.3      |
|       | Anti-sense primer | TTGAAGACAAACCGCTTTTCCA |                  |
| EP4   | Sense primer      | TGGTATGTGGGCTGGCTG     | NM-000958        |
|       | Anti-sense primer | GAGGACGGTGGCGAGAAT     |                  |
| GAPDH | Sense primer      | TTCACCACCATGGAGAAGGC   | XR031141.1       |
|       | Anti-sense primer | GGCATGGACTGTGGTCATGA   |                  |

sFig. 1. Jeong *et. al.*

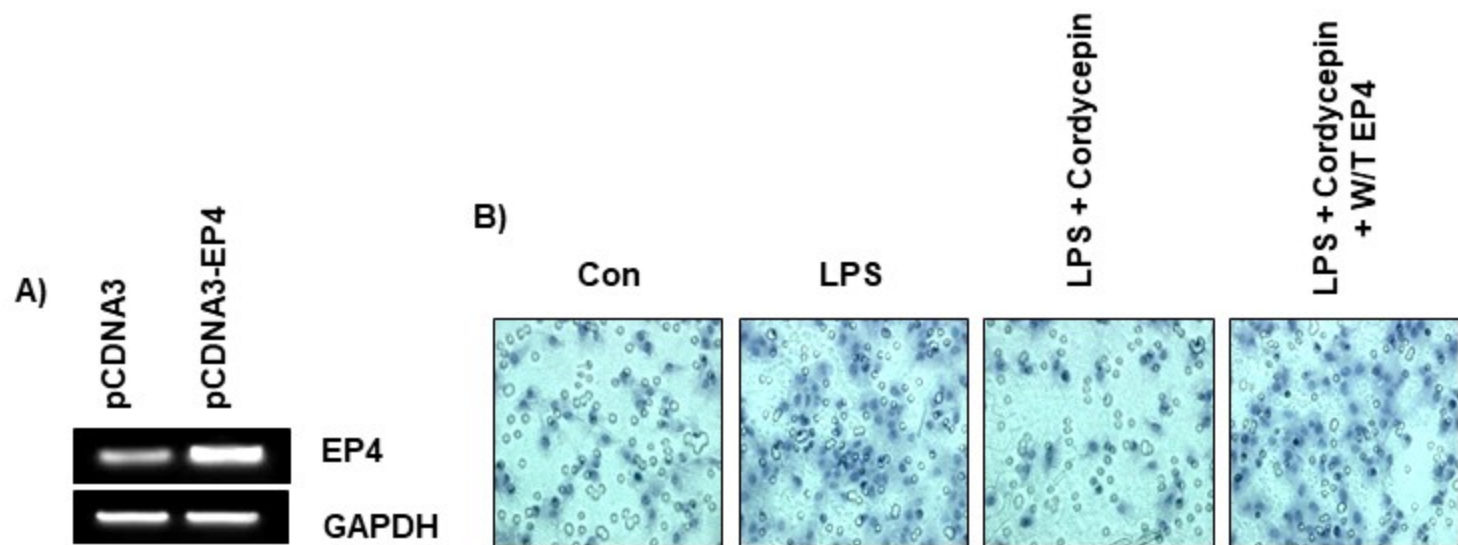

sFig. 2. Jeong *et. al.*

A)

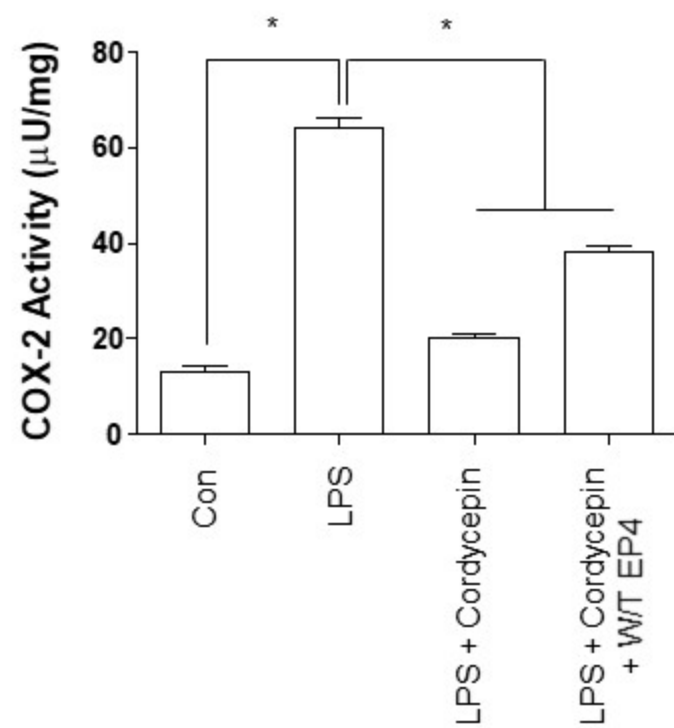

B)

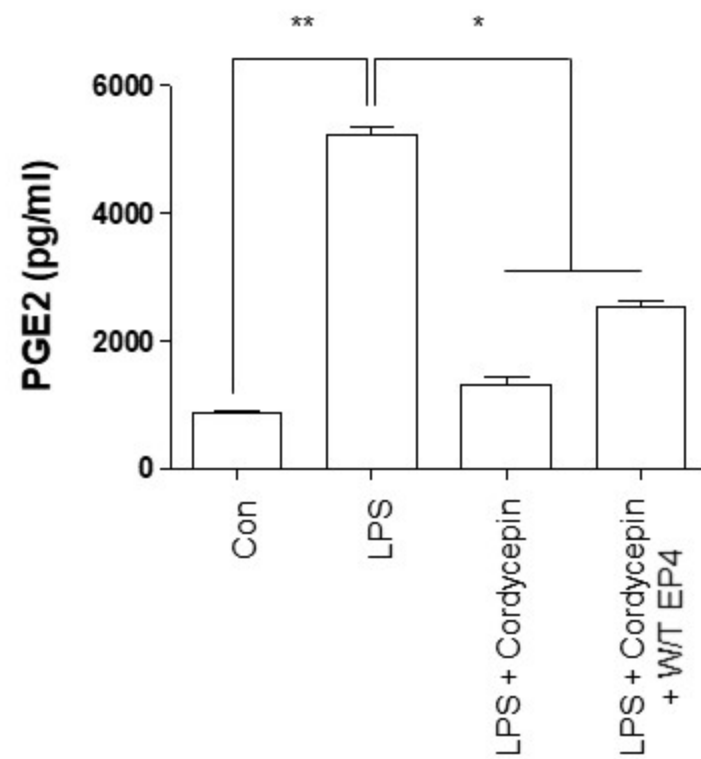

Supplement: bmb-51-532_suppl.pdf [file bmb-51-532_suppl.pdf]
